# Supplementary material for: Antibacterial and anti-adherence effects of a plant extract mixture (PEM) and its individual constituent extracts (Psidium sp., Mangifera sp., and Mentha sp.) on single- and dual-species biofilms
Source: PeerJ. 2016 Oct 5;4:e2519. doi: 10.7717/peerj.2519 (PMC5068394; doi:10.7717/peerj.2519)
Supplement: Data S1 [file peerj-04-2519-s003.xlsx]

## Sheet: S. sanguinis
Objective: to determine the anti-adherence effect of plant(s) extracts on Strep. sanguinis biofilm
a) Negative Control: S. sanguinis + C-ve								b) Positive Control: S. sanguinis+ 0.12% CHX gluconate										Dilution (T4)		CFU x 10-4 /ml						Mean CFU/ml of Streptococcus sanguinis BAA-1455
Bead	T2	T3	T4	T5	T6			Bead	T2	T3	T4	T5	T6					Bead	C-ve	CHX	Psidium	Mangifera	Mentha (T6)	TriQ*			Streptococcus sanguinis BAA-1455	STDEV
1	>300	>300	247	34	3	2015-04-30		1	0	0	0	0	0	13mei				1	247	0	170	60	75	82		C-ve	230	36.88
	>300	>300	202	31	2				0	0	0	0	0						202	0	119	73	68	58		0.12% CHX	3	4
	>300	>300	186	24	1				0	0	0	0	0						186	0	101	69	65	55		Psidium sp.	100	33
2	>300	>300	292	42	6			2	38	2	0	0	0					2	292	0	125	112	65	94		Mangifera sp.	86	24
	>300	>300	257	39	4				67	15	0	0	0						257	0	94	128	63	68		Mentha sp.	85	27
	>300	>300	259	36	3				61	10	0	0	0						259	0	85	106	53	57		TriQ*	80	19
3	>300	>300	214	22	3			3	0	0	0	0	0					3	214	0	177	130	67	69		Note: TriQ*=1.5mg/ml; 0.5mg/ml on-going.
	>300	>300	186	16	2				0	0	0	0	0						186	0	166	122	65	62
	>300	>300	182	15	1				0	0	0	0	0						182	0	131	115	56	62
4	>300	>300	273	31	1	6mei		4	0	0	0	0	0	27mei				4	273	0	97	72	69	124
	>300	>300	269	30	1				0	0	0	0	0						269	0	88	71	66	82
	>300	>300	210	29	1				0	0	0	0	0						210	0	80	62	62	65
5	>300	>300	224	24	1			5	15	2	0	0	0					5	224	0	75	101	83	79
	>300	>300	213	22	1				17	0	0	0	0						213	0	72	91	71	67
	>300	>300	208	22	0				14	0	0	0	0						208	0	61	89	59	55
6	>300	>300	207	22	1			6	0	0	0	0	0					6	207	0	73	103	141	87
	>300	>300	174	14	1				0	0	0	0	0						174	0	73	100	134	84
	>300	>300	164	14	1				0	0	0	0	0						164	0	62	73	99	80
7	>300	>300	237	26	3	29mei		7	>300	54	4	0	0	2015-07-31				7	237	4	81	91	141	107
	>300	>300	207	24	2				>300	61	10	2	0						207	10	72	70	120	78
	>300	>300	214	22	2				>300	57	7	0	0						214	7	65	62	119	75
8	>300	>300	297	38	4			8	>300	81	5	1	0					8	297	5	128	95	119	120
	>300	>300	277	38	4				>300	77	7	2	0						277	7	143	93	83	93
	>300	>300	265	37	4				>300	69	4	0	0						265	4	99	85	73	84
9	>300	>300	257	22	2			9	>300	74	13	3	0					9	257	13	94	54	109	96
	>300	>300	232	20	3				>300	59	10	3	0						232	10	93	54	84	93
	>300	>300	249	23	2				>300	62	12	1	0						249	12	87	44	82	93
Mean			229.704	26.5556	2.18519			Mean	11.7778	23.0741	2.66667	0.444444	0					Mean	229.704	2.66667	100.407	86.1111	84.8519	80.3333
STDEV			36.8822	8.14925	1.38778			STDEV	21.5121	31.5594	4.27875	0.9337	0					STDev	36.8822	4.27875	33.4161	23.8236	27.3323	18.512
c) Psidium sp.: S. sanguinis + JKg								d) Mangifera sp.: S. sanguinis+ MA
Bead	T2	T3	T4	T5	T6			Bead	T2	T3	T4	T5	T6
1	>300	>300	170	23	3			1	>300	>300	60	6	0	2015-04-30
	>300	>300	119	16	2	2015-04-30			>300	>300	73	9	0
	>300	>300	101	15	2				>300	>300	69	8	0
2	>300	>300	125	13	1			2	>300	>300	112	8	0
	>300	>300	94	11	1				>300	>300	128	10	0
	>300	>300	85	9	0				>300	>300	106	7	0
3	>300	>300	177	18	2			3	>300	>300	130	18	1
	>300	>300	166	18	2				>300	>300	122	10	0
	>300	>300	131	12	1				>300	>300	115	6	0
4	>300	>300	97	12	2	6mei		4	>300	>300	72	21	2	6mei
	>300	>300	88	11	1				>300	>300	71	9	1
	>300	>300	80	10	1				>300	>300	62	8	0
5	>300	>300	75	10	1			5	>300	>300	101	19	1
	>300	>300	72	10	1				>300	>300	91	12	1
	>300	>300	61	6	0				>300	>300	89	11	0
6	>300	>300	73	21	2			6	>300	>300	103	18	2
	>300	>300	73	13	1				>300	>300	100	16	1
	>300	>300	62	12	1				>300	>300	73	11	0
7	>300	>300	81	11	0	27mei		7	>300	>300	91	10	0	29mei
	>300	>300	72	9	0				>300	>300	70	10	0
	>300	>300	65	4	0				>300	>300	62	7	0
8	>300	>300	128	11	0			8	>300	>300	95	11	1
	>300	>300	143	11	1				>300	>300	93	9	0
	>300	>300	99	9	0				>300	>300	85	9	0
9	>300	>300	94	14	1			9	>300	>300	54	7	0
	>300	>300	93	8	0				>300	>300	54	7	0
	>300	>300	87	4	0				>300	>300	44	6	0
mean			100.407	11.8889	0.962963			Mean			86.1111	10.4815	0.37037
Std			33.4161	4.50925	0.854017			std			23.8236	4.23693	0.629294
data 30-april 2015
e) Mentha sp.: S. sanguinis + Pudina								f) TriQ* (1.5mg/ml): S. sanguinis + TriQ*
Bead	T2	T3	T4	T5	T6			Bead	T2	T3	T4	T5	T6
1	>300	>300	75	5	1	2015-04-22		1	>300	>300	82	10	0	6mei
	>300	>300	68	5	0				>300	>300	58	6	0
	>300	>300	65	2	0				>300	>300	55	4	0
2	>300	>300	65	7	1			2	>300	>300	94	10	0
	>300	>300	63	5	0				>300	>300	68	7	0
	>300	>300	53	4	0				>300	>300	57	4	0
3	>300	>300	67	6	0			3	>300	>300	69	10	0
	>300	>300	65	6	0				>300	>300	62	9	0
	>300	>300	56	4	0				>300	>300	62	6	0
4	>300	>300	69	8	1	13mei		4	>300	>300	124	12	0	13mei
	>300	>300	66	7	0				>300	>300	82	9	0
	>300	>300	62	6	0				>300	>300	65	6	0
5	>300	>300	83	10	1			5	>300	>300	79	10	0
	>300	>300	71	8	0				>300	>300	67	7	0
	>300	>300	59	6	0				>300	>300	55	6	0
6	>300	>300	141	19	2			6	>300	>300	87	11	0
	>300	>300	134	17	1				>300	>300	84	10	0
	>300	>300	99	13	1				>300	>300	80	9	0
7	>300	>300	141	19	2	27mei		7	>300	>300	107	12	0	29mei
	>300	>300	120	14	1				>300	>300	78	8	0
	>300	>300	119	10	0				>300	>300	75	7	0
8	>300	>300	119	13	1			8	>300	>300	120	11	0
	>300	>300	83	12	0				>300	>300	93	9	0
	>300	>300	73	8	0				>300	>300	84	4	0
9	>300	>300	109	9	0			9	>300	>300	96	8	0
	>300	>300	84	8	0				>300	>300	93	4	0
	>300	>300	82	3	0				>300	>300	93	5	0
Mean			84.8519	8.66667	0.444444			Mean			80.3333	7.92593	0
STDEV			27.3323	4.64095	0.640513			STDEV			18.512	2.52565	0

## Sheet: SPSS-Ssanguinis
untreated											Treated glass-beads (S.sanguinis x 10-4 cfu/ml)																			Mean CFU/ml of Streptococcus sanguinis BAA-1455
data label	C-ve					0.12%CHX					Psidium					Mangifera					Mentha					PEM					Streptococcus sanguinis BAA-1455	STDEV
	CFU/ml	%	%anti-ad			CFU/ml	%adherence	%anti-ad			CFU/ml	%	%anti-ad			CFU/ml	%	%anti-ad			CFU/ml	%	%anti-ad			CFU/ml	%	%anti-ad		C-ve	229.7	36.88
1	247	100	0		2	0	0	100		3	170	68.8259	31.1741		4	60	24.2915	75.7085		5	75	30.3644	69.6356		6	82	33.1984	66.8016		0.12% CHX	2.67	4.28
1	202	100	0		2	0	0	100		3	119	58.9109	41.0891		4	73	36.1386	63.8614		5	68	33.6634	66.3366		6	58	28.7129	71.2871		Psidium sp.	100.41	33.42
1	186	100	0		2	0	0	100		3	101	54.3011	45.6989		4	69	37.0968	62.9032		5	65	34.9462	65.0538		6	55	29.5699	70.4301		Mangifera sp.	86.11	23.82
1	292	100	0		2	0	0	100		3	125	42.8082	57.1918		4	112	38.3562	61.6438		5	65	22.2603	77.7397		6	94	32.1918	67.8082		Mentha sp.	84.85	27.33
1	257	100	0		2	0	0	100		3	94	36.5759	63.4241		4	128	49.8054	50.1946		5	63	24.5136	75.4864		6	68	26.4591	73.5409		PEM	80.33	18.51
1	259	100	0		2	0	0	100		3	85	32.8185	67.1815		4	106	40.9266	59.0734		5	53	20.4633	79.5367		6	57	22.0077	77.9923
1	214	100	0		2	0	0	100		3	177	82.7103	17.2897		4	130	60.7477	39.2523		5	67	31.3084	68.6916		6	69	32.243	67.757
1	186	100	0		2	0	0	100		3	166	89.2473	10.7527		4	122	65.5914	34.4086		5	65	34.9462	65.0538		6	62	33.3333	66.6667
1	182	100	0		2	0	0	100		3	131	71.978	28.022		4	115	63.1868	36.8132		5	56	30.7692	69.2308		6	62	34.0659	65.9341
1	273	100	0		2	0	0	100		3	97	35.5311	64.4689		4	72	26.3736	73.6264		5	69	25.2747	74.7253		6	124	45.4212	54.5788
1	269	100	0		2	0	0	100		3	88	32.7138	67.2862		4	71	26.3941	73.6059		5	66	24.5353	75.4647		6	82	30.4833	69.5167
1	210	100	0		2	0	0	100		3	80	38.0952	61.9048		4	62	29.5238	70.4762		5	62	29.5238	70.4762		6	65	30.9524	69.0476
1	224	100	0		2	0	0	100		3	75	33.4821	66.5179		4	101	45.0893	54.9107		5	83	37.0536	62.9464		6	79	35.2679	64.7321
1	213	100	0		2	0	0	100		3	72	33.8028	66.1972		4	91	42.723	57.277		5	71	33.3333	66.6667		6	67	31.4554	68.5446		% adherence of bacteria
1	208	100	0		2	0	0	100		3	61	29.3269	70.6731		4	89	42.7885	57.2115		5	59	28.3654	71.6346		6	55	26.4423	73.5577			S. sanguinis	STDEV
1	207	100	0		2	0	0	100		3	73	35.2657	64.7343		4	103	49.7585	50.2415		5	141	68.1159	31.8841		6	87	42.029	57.971		C-ve	100	0
1	174	100	0		2	0	0	100		3	73	41.954	58.046		4	100	57.4713	42.5287		5	134	77.0115	22.9885		6	84	48.2759	51.7241		0.12% CHX	1.1	1.79
1	164	100	0		2	0	0	100		3	62	37.8049	62.1951		4	73	44.5122	55.4878		5	99	60.3659	39.6341		6	80	48.7805	51.2195		Psidium sp.	44.41	16.24
1	237	100	0		2	4	1.68776	98.3122		3	81	34.1772	65.8228		4	91	38.3966	61.6034		5	141	59.4937	40.5063		6	107	45.1477	54.8523		Mangifera sp.	28.58	12.93
1	207	100	0		2	10	4.83092	95.1691		3	72	34.7826	65.2174		4	70	33.8164	66.1836		5	120	57.971	42.029		6	78	37.6812	62.3188		Mentha sp.	38.11	14.92
1	214	100	0		2	7	3.27103	96.729		3	65	30.3738	69.6262		4	62	28.972	71.028		5	119	55.6075	44.3925		6	75	35.0467	64.9533		PEM	35.16	6.7
1	297	100	0		2	5	1.6835	98.3165		3	128	43.0976	56.9024		4	95	31.9865	68.0135		5	119	40.0673	59.9327		6	120	40.404	59.596
1	277	100	0		2	7	2.52708	97.4729		3	143	51.6245	48.3755		4	93	33.574	66.426		5	83	29.9639	70.0361		6	93	33.574	66.426
1	265	100	0		2	4	1.50943	98.4906		3	99	37.3585	62.6415		4	85	32.0755	67.9245		5	73	27.5472	72.4528		6	84	31.6981	68.3019
1	257	100	0		2	13	5.05837	94.9416		3	94	36.5759	63.4241		4	54	21.0117	78.9883		5	109	42.4125	57.5875		6	96	37.3541	62.6459
1	232	100	0		2	10	4.31034	95.6897		3	93	40.0862	59.9138		4	54	23.2759	76.7241		5	84	36.2069	63.7931		6	93	40.0862	59.9138
1	249	100	0		2	12	4.81928	95.1807		3	87	34.9398	65.0602		4	44	17.6707	82.3293		5	82	32.9317	67.0683		6	93	37.3494	62.6506
Mean	229.704	100	0			2.66667	1.09992	98.9001		3	100.407	44.4137	55.5863		4	86.1111	38.5761	61.4239			84.8519	38.1117	61.8883		6	80.3333	35.1567	64.8433		% Anti-adherence of bacteria
STDEV	36.8822	0	0			4.27875	1.7879	1.7879		0	33.4161	16.2383	16.2383		0	23.8236	12.9349	12.9349		0	27.3323	14.9186	14.9186		0	18.512	6.70399	6.70399			Strep. sanguinis BAA-1455	STDEV
																														C-ve	0	0
		Strep. sanguinis BAA-1455	Strep. mutans ATCC 25175		STDEV	STDEV																								0.12% CHX	98.9	1.79
	C-ve	0	0		0	0																								Psidium sp.	55.59	16.24
	0.12% CHX	98.9	100		1.79	0																								Mangifera sp.	61.42	12.93
	Psidium sp.	55.59	59.11		16.24	6.54																								Mentha sp.	61.89	14.92
	Mangifera sp.	61.42	49.64		12.93	7.46																								PEM	64.84	6.7
	Mentha sp.	61.89	42.62		14.92	7.91
	PEM	64.84	46.97		6.7	8.03
untreated											Treated glass-beads (S.sanguinis x 10-5 cfu/ml)
data label	C-ve					0.12%CHX					Psidium					Mangifera					Mentha					PEM
	CFU/ml	%adherence	%anti-ad			CFU/ml	%adherence	%anti-ad			CFU/ml	%adherence	%anti-ad			CFU/ml	%adherence	%anti-ad			CFU/ml	%adherence	%anti-ad			CFU/ml	%adherence	%anti-ad
1	24.7	100	0		2	0	0	100		3	17	68.8259	31.1741		4	6	24.2915	75.7085		5	7.5	30.3644	69.6356		6	8.2	33.1984	66.8016
1	20.2	100	0		2	0	0	100		3	11.9	58.9109	41.0891		4	7.3	36.1386	63.8614		5	6.8	33.6634	66.3366		6	5.8	28.7129	71.2871
1	18.6	100	0		2	0	0	100		3	10.1	54.3011	45.6989		4	6.9	37.0968	62.9032		5	6.5	34.9462	65.0538		6	5.5	29.5699	70.4301
1	29.2	100	0		2	0	0	100		3	12.5	42.8082	57.1918		4	11.2	38.3562	61.6438		5	6.5	22.2603	77.7397		6	9.4	32.1918	67.8082
1	25.7	100	0		2	0	0	100		3	9.4	36.5759	63.4241		4	12.8	49.8054	50.1946		5	6.3	24.5136	75.4864		6	6.8	26.4591	73.5409
1	25.9	100	0		2	0	0	100		3	8.5	32.8185	67.1815		4	10.6	40.9266	59.0734		5	5.3	20.4633	79.5367		6	5.7	22.0077	77.9923
1	21.4	100	0		2	0	0	100		3	17.7	82.7103	17.2897		4	13	60.7477	39.2523		5	6.7	31.3084	68.6916		6	6.9	32.243	67.757
1	18.6	100	0		2	0	0	100		3	16.6	89.2473	10.7527		4	12.2	65.5914	34.4086		5	6.5	34.9462	65.0538		6	6.2	33.3333	66.6667
1	18.2	100	0		2	0	0	100		3	13.1	71.978	28.022		4	11.5	63.1868	36.8132		5	5.6	30.7692	69.2308		6	6.2	34.0659	65.9341
1	27.3	100	0		2	0	0	100		3	9.7	35.5311	64.4689		4	7.2	26.3736	73.6264		5	6.9	25.2747	74.7253		6	12.4	45.4212	54.5788
1	26.9	100	0		2	0	0	100		3	8.8	32.7138	67.2862		4	7.1	26.3941	73.6059		5	6.6	24.5353	75.4647		6	8.2	30.4833	69.5167
1	21	100	0		2	0	0	100		3	8	38.0952	61.9048		4	6.2	29.5238	70.4762		5	6.2	29.5238	70.4762		6	6.5	30.9524	69.0476
1	22.4	100	0		2	0	0	100		3	7.5	33.4821	66.5179		4	10.1	45.0893	54.9107		5	8.3	37.0536	62.9464		6	7.9	35.2679	64.7321
1	21.3	100	0		2	0	0	100		3	7.2	33.8028	66.1972		4	9.1	42.723	57.277		5	7.1	33.3333	66.6667		6	6.7	31.4554	68.5446
1	20.8	100	0		2	0	0	100		3	6.1	29.3269	70.6731		4	8.9	42.7885	57.2115		5	5.9	28.3654	71.6346		6	5.5	26.4423	73.5577
1	20.7	100	0		2	0	0	100		3	7.3	35.2657	64.7343		4	10.3	49.7585	50.2415		5	14.1	68.1159	31.8841		6	8.7	42.029	57.971
1	17.4	100	0		2	0	0	100		3	7.3	41.954	58.046		4	10	57.4713	42.5287		5	13.4	77.0115	22.9885		6	8.4	48.2759	51.7241
1	16.4	100	0		2	0	0	100		3	6.2	37.8049	62.1951		4	7.3	44.5122	55.4878		5	9.9	60.3659	39.6341		6	8	48.7805	51.2195
1	23.7	100	0		2	0.4	1.68776	98.3122		3	8.1	34.1772	65.8228		4	9.1	38.3966	61.6034		5	14.1	59.4937	40.5063		6	10.7	45.1477	54.8523
1	20.7	100	0		2	1	4.83092	95.1691		3	7.2	34.7826	65.2174		4	7	33.8164	66.1836		5	12	57.971	42.029		6	7.8	37.6812	62.3188
1	21.4	100	0		2	0.7	3.27103	96.729		3	6.5	30.3738	69.6262		4	6.2	28.972	71.028		5	11.9	55.6075	44.3925		6	7.5	35.0467	64.9533
1	29.7	100	0		2	0.5	1.6835	98.3165		3	12.8	43.0976	56.9024		4	9.5	31.9865	68.0135		5	11.9	40.0673	59.9327		6	12	40.404	59.596
1	27.7	100	0		2	0.7	2.52708	97.4729		3	14.3	51.6245	48.3755		4	9.3	33.574	66.426		5	8.3	29.9639	70.0361		6	9.3	33.574	66.426
1	26.5	100	0		2	0.4	1.50943	98.4906		3	9.9	37.3585	62.6415		4	8.5	32.0755	67.9245		5	7.3	27.5472	72.4528		6	8.4	31.6981	68.3019
1	25.7	100	0		2	1.3	5.05837	94.9416		3	9.4	36.5759	63.4241		4	5.4	21.0117	78.9883		5	10.9	42.4125	57.5875		6	9.6	37.3541	62.6459
1	23.2	100	0		2	1	4.31034	95.6897		3	9.3	40.0862	59.9138		4	5.4	23.2759	76.7241		5	8.4	36.2069	63.7931		6	9.3	40.0862	59.9138
1	24.9	100	0		2	1.2	4.81928	95.1807		3	8.7	34.9398	65.0602		4	4.4	17.6707	82.3293		5	8.2	32.9317	67.0683		6	9.3	37.3494	62.6506
Mean	22.9704	100	0			0.266667	1.09992	98.9001		3	10.0407	44.4137	55.5863		4	8.61111	38.5761	61.4239			8.48519	38.1117	61.8883		6	8.03333	35.1567	64.8433
STDEV	3.68822	0	0			0.427875	1.7879	1.7879		0	3.34161	16.2383	16.2383		0	2.38236	12.9349	12.9349		0	2.73323	14.9186	14.9186		0	1.8512	6.70399	6.70399
	anti-adherence
		Strep. sanguinis BAA-1455	Strep. mutans ATCC 25175		STDEV	STDEV
	C-ve	0	0		0	0
	0.12% CHX	98.9	100		1.79	0
	Psidium sp.	55.59	59.11		16.24	6.54
	Mangifera sp.	61.42	49.64		12.93	7.46
	Mentha sp.	61.89	42.62		14.92	7.91
	PEM	64.84	46.97		6.7	8.03

## Sheet: S. mutans
data NAM using mid-log phase of bacterial growth (S. mutans; 6 hours) and ( S. sanguinis; 8 hours)
a) Negative Control: Smutans + C-ve (1/4/2015)									b) Positive Control: Smutans + 0.12% CHX gluconate								Dilution (T5)	T5	CFU x 10-5 /ml						Test	Mean CFU/ml of Streptococcus mutans ATCC 25175	STDEV
Bead	T2	T3	T4	T5	T6	T7			Bead	T2	T3	T4	T5	T6	T7		Bead	C-ve	0.12%CHX	Psidium	Mangifera	Mentha	TriQ*		C-ve	248	16
1	>300	>300	>300	260	36	10			1	0	0	0	0	0	0		1	260	0	100	152	148	163		0.12% CHX	0	0
	>300	>300	>300	260	35	9				0	0	0	0	0	0			260	0	98	130	140	164		Psidium sp.	101	16
	>300	>300	>300	251	32	5				0	0	0	0	0	0			251	0	92	125	142	157		Mangifera sp.	125	18
2	>300	>300	>300	269	54	14			2	0	0	0	0	0	0		2	269	0	104	145	116	172		Mentha sp.	146	27
	>300	>300	>300	291	57	11				0	0	0	0	0	0			291	0	81	142	119	142		TriQ*	132	22
	>300	>300	>300	242	48	12				0	0	0	0	0	0			242	0	77	141	118	139
3	>300	>300	>300	261	42	13			3	0	0	0	0	0	0		3	261	0	123	130	175	165
	>300	>300	>300	257	39	9				0	0	0	0	0	0			257	0	101	129	177	129
	>300	>300	>300	227	32	4				0	0	0	0	0	0			227	0	94	109	171	113
4	>300	>300	>300	269	58	11			4	0	0	0	0	0	0		4	269	0	132	145	166	138
	>300	>300	>300	249	57	10				0	0	0	0	0	0			249	0	104	138	140	122
	>300	>300	>300	235	56	5				0	0	0	0	0	0			235	0	107	133	146	113
5	>300	>300	>300	257	56	7			5	0	0	0	0	0	0		5	257	0	88	98	122	120
	>300	>300	>300	248	46	5				0	0	0	0	0	0			248	0	72	96	129	109
	>300	>300	>300	234	42	5				0	0	0	0	0	0			234	0	75	93	137	104
6	>300	>300	>300	235	42	6			6	0	0	0	0	0	0		6	235	0	107	154	137	124
	>300	>300	>300	230	40	5				0	0	0	0	0	0			230	0	88	145	123	120
	>300	>300	>300	222	32	4				0	0	0	0	0	0			222	0	81	112	126	118
7	>300	>300	>300	226	40	5			7	0	0	0	0	0	0		7	226	0	126	144	135	171
	>300	>300	>300	257	46	6				0	0	0	0	0	0			257	0	112	125	130	146
	>300	>300	>300	230	39	5				0	0	0	0	0	0			230	0	94	116	148	127
8	>300	>300	>300	246	49	7			8	0	0	0	0	0	0		8	246	0	109	120	151	117
	>300	>300	>300	243	48	6				0	0	0	0	0	0			243	0	103	112	150	109
	>300	>300	>300	231	46	8				0	0	0	0	0	0			231	0	106	92	159	106
9	>300	>300	>300	261	66	9			9	0	0	0	0	0	0		9	261	0	126	124	130	140
	>300	>300	>300	260	52	10				0	0	0	0	0	0			260	0	123	112	146	128
	>300	>300	>300	252	47	8				0	0	0	0	0	0			252	0	113	108	148	100
Mean				248.259	45.8148	7.74074			Mean	0	0	0	0	0	0		Mean	248.259	0	101.333	124.815	141.815	131.704
STDEV				16.2967	9.05129	2.8902			STDEV	0	0	0	0	0	0		STDev	16.2967	0	16.4597	18.4141	17.1712	21.8822
c) Psidium sp.: Smutans + JKg (21/3 & 9/4/2015)									d) Mangifera sp.: Smutans + MA (7/4 & 16/4/2015)
Bead	T2	T3	T4	T5	T6	T7			Bead	T2	T3	T4	T5	T6	T7
1	>300	>300	>300	100	9	6	21-mac		1	>300	>300	>300	152	21	2	2015-04-08
	>300	>300	>300	98	9	4				>300	>300	>300	130	20	3
	>300	>300	>300	92	7	11				>300	>300	>300	125	19	3
2	>300	>300	>300	104	9	1			2	>300	>300	>300	145	20	3
	>300	>300	>300	81	9	1				>300	>300	>300	142	19	2
	>300	>300	>300	77	7	0				>300	>300	>300	141	11	0
3	>300	>300	>300	123	13	2			3	>300	>300	>300	130	17	2
	>300	>300	>300	101	8	1				>300	>300	>300	129	15	3
	>300	>300	>300	94	10	2				>300	>300	>300	109	15	1
4	>300	>300	>300	132	20	5			4	>300	>300	>300	145	18	2
	>300	>300	>300	104	12	4				>300	>300	>300	138	17	3
	>300	>300	>300	107	11	1				>300	>300	>300	133	17	4
5	>300	>300	>300	88	15	2			5	>300	>300	>300	98	11	2
	>300	>300	>300	72	12	0				>300	>300	>300	96	10	1
	>300	>300	>300	75	11	1				>300	>300	>300	93	9	1
6	>300	>300	>300	107	13	1			6	>300	>300	>300	154	24	6	2015-04-16
	>300	>300	>300	88	10	0				>300	>300	>300	145	19	3
	>300	>300	>300	81	10	0				>300	>300	>300	112	15	4
7	>300	>300	>300	126	17	3	2015-04-09		7	>300	>300	>300	144	14	3
	>300	>300	>300	112	12	2				>300	>300	>300	125	13	2
	>300	>300	>300	94	10	1				>300	>300	>300	116	12	1
8	>300	>300	>300	109	14	5			8	>300	>300	>300	120	24	6
	>300	>300	>300	103	10	2				>300	>300	>300	112	22	4
	>300	>300	>300	106	10	2				>300	>300	>300	92	15	7
9	>300	>300	>300	126	30	8			9	>300	>300	>300	124	15	4
	>300	>300	>300	123	29	5				>300	>300	>300	112	15	5
	>300	>300	>300	113	24	3				>300	>300	>300	108	12	2
Mean				101.333	13	2.7037			Mean				124.815	16.2593	2.92593
STDEV				16.4597	6.08276	2.62847			STDEV				18.4141	4.10996	1.68537
e) Mentha sp.: Smutans + Pudina (4-6/9/2015									f) TriQ*: Smutans + TriQ* (1/4/2015)
Bead	T2	T3	T4	T5	T6	T7			Bead	T2	T3	T4	T5	T6	T7
1	>300	>300	>300	148	20	3			1	>300	>300	>300	163	29	4	19mac
	>300	>300	>300	140	15	1				>300	>300	>300	164	30	3
	>300	>300	>300	142	18	2				>300	>300	>300	157	27	5
2	>300	>300	>300	116	11	1			2	>300	>300	>300	172	26	4
	>300	>300	>300	119	22	2				>300	>300	>300	142	20	3
	>300	>300	>300	118	11	1				>300	>300	>300	139	19	2
3	>300	>300	>300	175	51	7			3	>300	>300	>300	165	31	3
	>300	>300	>300	177	54	8				>300	>300	>300	129	16	2
	>300	>300	>300	171	40	5				>300	>300	>300	113	11	2
4	>300	>300	>300	166	25	3			4	>300	>300	>300	138	38	5	2015-04-09
	>300	>300	>300	140	17	2				>300	>300	>300	122	31	4
	>300	>300	>300	146	22	2				>300	>300	>300	113	31	3
5	>300	>300	>300	122	6	0			5	>300	>300	>300	120	20	4
	>300	>300	>300	129	24	3				>300	>300	>300	109	18	2
	>300	>300	>300	137	18	2				>300	>300	>300	104	15	0
6	>300	>300	>300	137	17	2			6	>300	>300	>300	124	15	3
	>300	>300	>300	123	14	2				>300	>300	>300	120	14	3
	>300	>300	>300	126	11	1				>300	>300	>300	118	11	2
7	>300	>300	>300	135	29	3			7	>300	>300	>300	171	32	4	6mei
	>300	>300	>300	130	25	4				>300	>300	>300	146	30	2
	>300	>300	>300	148	31	5				>300	>300	>300	127	23	0
8	>300	>300	>300	151	31	3			8	>300	>300	>300	117	22	5
	>300	>300	>300	150	28	3				>300	>300	>300	109	19	4
	>300	>300	>300	159	23	2				>300	>300	>300	106	15	3
9	>300	>300	>300	130	26	3			9	>300	>300	>300	140	27	3
	>300	>300	>300	146	29	5				>300	>300	>300	128	17	2
	>300	>300	>300	148	31	4				>300	>300	>300	100	14	2
Mean				141.815	24.037	2.92593			Mean				131.704	22.2593	2.92593
STDEV				19.9647	13.3284	2.09028			STDEV				21.8822	7.49663	1.2987

## Sheet: SPSS-Sm
untreated											Treated glass-beads (x 10^5 CFU/ml)																			Mean CFU/ml of Streptococcus mutans ATCC 25175
data label	C-ve					0.12%CHX					Psidium					Mangifera					Mentha					TriQ*					Streptococcus mutans ATCC 25175	STDEV
	CFU/ml	%adhere	%anti-ad			CFU/ml	%adherence	%anti-ad			CFU/ml	%Adh	%Anti-ad			CFU/ml	%Adh	%Anti-ad			CFU/ml	%Adh	%Anti-ad			CFU/ml	%Adh	%Anti-ad		C-ve	248.26	16.3
1	260	100	0		2	0	0	100		3	100	38.4615	61.5385		4	152	58.4615	41.5385		5	148	56.9231	43.0769		6	163	62.6923	37.3077		0.12% CHX	0	0
1	260	100	0		2	0	0	100		3	98	37.6923	62.3077		4	130	50	50		5	140	53.8462	46.1538		6	164	63.0769	36.9231		Psidium sp.	101.33	16.46
1	251	100	0		2	0	0	100		3	92	36.6534	63.3466		4	125	49.8008	50.1992		5	142	56.5737	43.4263		6	157	62.5498	37.4502		Mangifera sp.	124.81	18.41
1	269	100	0		2	0	0	100		3	104	38.6617	61.3383		4	145	53.9033	46.0967		5	116	43.1227	56.8773		6	172	63.9405	36.0595		Mentha sp.	141.81	17.17
1	291	100	0		2	0	0	100		3	81	27.8351	72.1649		4	142	48.7973	51.2027		5	119	40.8935	59.1065		6	142	48.7973	51.2027		TriQ*	131.7	21.88
1	242	100	0		2	0	0	100		3	77	31.8182	68.1818		4	141	58.2645	41.7355		5	118	48.7603	51.2397		6	139	57.438	42.562
1	261	100	0		2	0	0	100		3	123	47.1264	52.8736		4	130	49.8084	50.1916		5	175	67.0498	32.9502		6	165	63.2184	36.7816
1	257	100	0		2	0	0	100		3	101	39.2996	60.7004		4	129	50.1946	49.8054		5	177	68.8716	31.1284		6	129	50.1946	49.8054
1	227	100	0		2	0	0	100		3	94	41.4097	58.5903		4	109	48.0176	51.9824		5	171	75.3304	24.6696		6	113	49.7797	50.2203
1	269	100	0		2	0	0	100		3	132	49.0706	50.9294		4	145	53.9033	46.0967		5	166	61.71	38.29		6	138	51.3011	48.6989
1	249	100	0		2	0	0	100		3	104	41.7671	58.2329		4	138	55.4217	44.5783		5	140	56.2249	43.7751		6	122	48.996	51.004
1	235	100	0		2	0	0	100		3	107	45.5319	54.4681		4	133	56.5957	43.4043		5	146	62.1277	37.8723		6	113	48.0851	51.9149
1	257	100	0		2	0	0	100		3	88	34.2412	65.7588		4	98	38.1323	61.8677		5	122	47.4708	52.5292		6	120	46.6926	53.3074
1	248	100	0		2	0	0	100		3	72	29.0323	70.9677		4	96	38.7097	61.2903		5	129	52.0161	47.9839		6	109	43.9516	56.0484		% adherence of Streptococcus mutans ATCC 25175
1	234	100	0		2	0	0	100		3	75	32.0513	67.9487		4	93	39.7436	60.2564		5	137	58.547	41.453		6	104	44.4444	55.5556			Streptococcus mutans ATCC 25175	STDEV
1	235	100	0		2	0	0	100		3	107	45.5319	54.4681		4	154	65.5319	34.4681		5	137	58.2979	41.7021		6	124	52.766	47.234		C-ve	100	0
1	230	100	0		2	0	0	100		3	88	38.2609	61.7391		4	145	63.0435	36.9565		5	123	53.4783	46.5217		6	120	52.1739	47.8261		0.12% CHX	0	0
1	222	100	0		2	0	0	100		3	81	36.4865	63.5135		4	112	50.4505	49.5495		5	126	56.7568	43.2432		6	118	53.1532	46.8468		Psidium sp.	40.89	6.54
1	226	100	0		2	0	0	100		3	126	55.7522	44.2478		4	144	63.7168	36.2832		5	135	59.7345	40.2655		6	171	75.6637	24.3363		Mangifera sp.	50.36	7.46
1	257	100	0		2	0	0	100		3	112	43.5798	56.4202		4	125	48.6381	51.3619		5	130	50.5837	49.4163		6	146	56.8093	43.1907		Mentha sp.	57.38	7.91
1	230	100	0		2	0	0	100		3	94	40.8696	59.1304		4	116	50.4348	49.5652		5	148	64.3478	35.6522		6	127	55.2174	44.7826		PEM	53.03	8.03
1	246	100	0		2	0	0	100		3	109	44.3089	55.6911		4	120	48.7805	51.2195		5	151	61.3821	38.6179		6	117	47.561	52.439
1	243	100	0		2	0	0	100		3	103	42.3868	57.6132		4	112	46.0905	53.9095		5	150	61.7284	38.2716		6	109	44.856	55.144
1	231	100	0		2	0	0	100		3	106	45.8874	54.1126		4	92	39.8268	60.1732		5	159	68.8312	31.1688		6	106	45.8874	54.1126
1	261	100	0		2	0	0	100		3	126	48.2759	51.7241		4	124	47.5096	52.4904		5	130	49.8084	50.1916		6	140	53.6398	46.3602
1	260	100	0		2	0	0	100		3	123	47.3077	52.6923		4	112	43.0769	56.9231		5	146	56.1538	43.8462		6	128	49.2308	50.7692
1	252	100	0		2	0	0	100		3	113	44.8413	55.1587		4	108	42.8571	57.1429		5	148	58.7302	41.2698		6	100	39.6825	60.3175
	248.259	100	0		2	0	0	100		3	101.333	40.8941	59.1059		4	124.815	50.3597	49.6403		5	141.815	57.3815	42.6185		6	131.704	53.0296	46.9704
	16.2967	0	0		0	0	0	0		0	16.4597	6.5394	6.5394		0	18.4141	7.45747	7.45747		0	17.1712	7.90545	7.90545		0	21.8822	8.03023	8.03023
																														% Anti-adherence of Streptococcus mutans ATCC 25175
																															Streptococcus mutans ATCC 25175	STDEV
																														C-ve	0	0
																														0.12% CHX	100	0
																														Psidium sp.	59.11	6.54
																														Mangifera sp.	49.64	7.46
																														Mentha sp.	42.62	7.91
																														PEM	46.97	8.03

## Sheet: S. sanguinis+S. mutans
Effect of plant extract on adherence of the mixture of S. sanguinis + S. mutans biofilm.
																			S. sanguinis count
a) Negative Control: S. sanguinis + C-ve (1/4/2015)								a) Negative Control: Smutans + C-ve (1/4/2015)									Dilution (T5)		S. sanguinis CFU x 10-5 /ml						Dilution (T5)		S. mutans CFU x 10-5 /ml
Bead	T2	T3	T4	T5	T6	T7		Bead	T2	T3	T4	T5	T6	T7			Bead	C-ve (T5)	0.12% CHX (T4)	Psidium (T4)	Mangifera (T5)	Mentha (T4)	TriQ*(T5)		Bead	C-ve(T5)	0.12% CHX (T5)	Psidium (T4)	Mangifera (T5)	Mentha (T5)	TriQ*(T5)
1	>300	>300	>300	199	32	9		1	>300	>300	>300	164	21	11	2015-04-17		1	199	10.8	13.1	69	18.7	106		1	164	0	12	59	98	61
	>300	>300	>300	183	30	7			>300	>300	>300	173	33	12				183	10.7	13.8	70	19.2	91			173	0	13.2	56	88	41
	>300	>300	>300	176	27	5			>300	>300	>300	183	37	16				176	9.6	14.2	68	19.1	107			183	0	15.8	62	69	43
2	>300	>300	>300	164	39	6		2	>300	>300	>300	163	28	7			2	164	15.8	21.8	69	12.1	121		2	163	0	17.4	89	57	108
	>300	>300	>300	199	30	7			>300	>300	>300	183	26	7				199	14.8	22.9	53	9.5	102			183	0	29.2	107	56	93
	>300	>300	>300	171	45	5			>300	>300	>300	185	33	10				171	13.9	18.8	77	15.8	103			185	0	21	108	54	98
3	>300	>300	>300	115	24	5		3	>300	>300	>300	124	21	4			3	115	9.4	24.5	46	20.1	75		3	124	0	22.8	79	69	64
	>300	>300	>300	116	20	4			>300	>300	>300	124	33	5				116	8.4	21.6	62	21.1	58			124	0	20.2	68	81	52
	>300	>300	>300	105	16	3			>300	>300	>300	122	37	4				105	11.5	15.8	67	20.7	68			122	0	13.2	66	71	50
4	>300	>300	>300	156	33	9		4	>300	>300	>300	105	28	3	7-mei		4	156	9.9	11.3	55	28.7	56		4	105	0	10.3	39	92	92
	>300	>300	>300	214	29	6			>300	>300	>300	102	12	4				214	8.3	10.5	52	18	51			102	0	14.1	29	92	94
	>300	>300	>300	194	36	4			>300	>300	>300	93	12	3				194	7.6	10.5	67	27	40			93	0	13.7	32	92	83
5	>300	>300	236	165	21	0		5	>300	>300	>300	191	24	1			5	165	6.9	10.7	62	22.2	104		5	191	0	13.9	59	65	86
	>300	>300	>300	121	15	0			>300	>300	>300	173	22	2				121	7.2	14.5	40	22.6	93			173	0	15.9	53	69	90
	>300	>300	>300	124	14	0			>300	>300	>300	183	24	1				124	8.4	12.1	40	22.8	86			183	0	13.1	43	62	77
6	>300	>300	>300	109	8	0		6	>300	>300	>300	208	37	2			6	109	6.1	18.8	83	17.9	92		6	208	0	29.5	40	78	63
	>300	>300	>300	108	9	0			>300	>300	>300	217	37	2				108	7.6	18.4	81	20.1	74			217	0	24.6	31	72	69
	>300	>300	>300	118	14	0			>300	>300	>300	149	35	2				118	7.2	12.3	72	17.8	92			149	0	20.1	35	83	88
7	>300	>300	>300	182	42	3		7	>300	>300	>300	164	23	1	2015-07-31		7	182	3.9	18.5	97	15.3	60		7	164	0	24.4	56	63	72
	>300	>300	>300	186	30	2			>300	>300	>300	200	41	3				186	3.5	21.4	85	18.8	65			200	0	20.1	72	85	48
	>300	>300	>300	180	35	3			>300	>300	>300	150	21	1				180	4.3	16.3	67	12.8	53			150	0	21.5	78	72	60
8	>300	>300	>300	107	15	1		8	>300	>300	>300	122	35	4			8	107	5.7	10.5	76	13.2	42		8	122	0	10.7	81	55	63
	>300	>300	>300	159	20	1			>300	>300	>300	155	49	5				159	4.2	11.6	69	12.6	45			155	0	14.6	87	63	78
	>300	>300	>300	145	25	2			>300	>300	>300	145	33	3				145	4.2	12.4	75	19.3	48			145	0	14	89	46	85
9	>300	>300	>300	107	16	2		9	>300	>300	>300	133	23	2			9	107	5.9	18.7	79	10.5	62		9	133	0	10.8	47	62	67
	>300	>300	>300	118	23	2			>300	>300	>300	156	34	2				118	7.4	18.6	78	8.9	63			156	0	13.5	40	69	98
	>300	>300	>300	111	25	2			>300	>300	>300	100	35	3				111	6.2	18	67	11.1	65			100	0	14.5	36	65	75
Mean				149.333	24.9259	3.25926		Mean				154.333	29.4074	4.44444			Mean	149.333	8.12593	15.9852	67.6296	17.6259	85.04		Mean	154.333	0	17.1889	60.7778	71.4074	74
STDEV				35.8662	9.87197	2.78171		STDEV				34.5365	8.64807	3.78594			STDev	35.8662	3.26244	4.30015	13.4969	5.07593	31.27		STDev	34.5365	0	5.4529	23.0807	13.5824	18.3848
b) Positive Control: S. sanguinis + 0.12% CHX gluconate								b) Positive Control: Smutans + 0.12% CHX gluconate
Bead	T2	T3	T4	T5	T6	T7		Bead	T2	T3	T4	T5	T6	T7
1	>300	>300	108	14	1	0		1	0	0	0	0	0	0	2015-04-21
	>300	>300	107	14	1	0			0	0	0	0	0	0
	>300	>300	96	10	0	0			0	0	0	0	0	0
2	>300	>300	158	23	1	0		2	0	0	0	0	0	0
	>300	>300	148	13	0	0			0	0	0	0	0	0
	>300	>300	139	10	0	0			0	0	0	0	0	0
3	>300	>300	94	15	0	0		3	0	0	0	0	0	0
	>300	>300	84	12	0	0			0	0	0	0	0	0
	>300	>300	115	16	0	0			0	0	0	0	0	0
4	>300	>300	99	17	0	0		4	4	0	0	0	0	0	2015-07-27
	>300	>300	83	14	0	0			4	0	0	0	0	0
	>300	>300	76	13	0	0			3	0	0	0	0	0
5	>300	>300	69	10	0	0		5	8	4	0	0	0	0
	>300	>300	72	11	0	0			4	0	0	0	0	0
	>300	>300	84	13	0	0			4	0	0	0	0	0
6	>300	>300	61	9	0	0		6	4	1	0	0	0	0
	>300	>300	76	8	0	0			4	0	0	0	0	0
	>300	>300	72	7	0	0			3	0	0	0	0	0
7	>300	>300	39	3	0	0		7	4	1	0	0	0	0	2015-07-31
	>300	>300	35	3	0	0			3	0	0	0	0	0
	>300	>300	43	3	0	0			3	0	0	0	0	0
8	>300	>300	57	1	0	0		8	0	0	0	0	0	0
	>300	>300	42	0	0	0			0	0	0	0	0	0
	>300	>300	42	0	0	0			0	0	0	0	0	0
9	>300	>300	59	10	1	0		9	0	0	0	0	0	0
	>300	>300	74	13	3	0			0	0	0	0	0	0
	>300	>300	62	10	2	0			0	0	0	0	0	0
Mean			81.2593	10.0741	0.333333	0		Mean	1.77778	0.222222	0	0	0	0
STDEV			32.6244	5.58105	0.733799	0		STDEV	2.20721	0.800641	0	0	0	0
c) Psidium sp.: S. sanguinis + JKg								c) Psidium sp.: S. mutans + JKg
Bead	T2	T3	T4	T5	T6	T7		Bead	T2	T3	T4	T5	T6	T7
1	>300	>300	131	15	5	2		1	>300	>300	120	22	2	1	2015-04-22
	>300	>300	138	28	9	1			>300	>300	132	43	11	1
	>300	>300	142	33	9	1			>300	>300	158	42	14	0
2	>300	>300	218	37	13	2		2	>300	>300	174	39	17	3
	>300	>300	229	37	5	0			>300	>300	292	46	14	7
	>300	>300	188	35	6	0			>300	>300	210	46	7	0
3	>300	>300	245	30	12	0		3	>300	>300	228	45	5	0
	>300	>300	216	22	8	0			>300	>300	202	39	3	0
	>300	>300	158	21	2	0			>300	>300	132	29	3	0
4	>300	>300	113	5	2	0		4	>300	>300	103	13	2	0	7-mei
	>300	>300	105	9	2	0			>300	>300	141	13	10	0
	>300	>300	105	7	2	0			>300	>300	137	15	6	0
5	>300	>300	107	8	1	0		5	>300	>300	139	12	2	0
	>300	>300	145	13	3	0			>300	>300	159	16	1	0
	>300	>300	121	11	1	0			>300	>300	131	14	1	0
6	>300	>300	188	24	1	0		6	>300	>300	295	55	4	0
	>300	>300	184	17	0	0			>300	>300	246	42	2	0
	>300	>300	123	22	1	0			>300	>300	201	34	1	0
7	>300	>300	185	17	1	0		7	>300	>300	244	16	2	0	2015-07-31
	>300	>300	214	7	0	0			>300	>300	201	22	2	0
	>300	>300	163	3	0	0			>300	>300	215	22	2	0
8	>300	>300	105	2	0	0		8	>300	>300	107	12	1	0
	>300	>300	116	2	0	0			>300	>300	146	21	2	0
	>300	>300	124	2	0	0			>300	>300	140	19	2	0
9	>300	>300	187	33	4	0		9	>300	>300	108	21	2	0
	>300	>300	186	21	2	0			>300	>300	135	25	3	0
	>300	>300	180	19	1	0			>300	>300	145	26	4	0
Mean			159.852	17.7778	3.33333	0.222222		Mean			171.889	27.7407	4.62963	0.444444
STDEV			43.0015	11.537	3.80283	0.57735		STDEV			54.529	13.1195	4.54167	1.45002
d) Mangifera sp.: S. sanguinis + MA								d) Mangifera sp.: Smutans + MA
Bead	T2	T3	T4	T5	T6	T7		Bead	T2	T3	T4	T5	T6	T7
1	>300	>300	>300	69	8	1		1	>300	>300	>300	59	21	2	2015-04-12
	>300	>300	>300	70	6	1			>300	>300	>300	56	12	1
	>300	>300	>300	68	10	1			>300	>300	>300	62	9	1
2	>300	>300	>300	69	21	2		2	>300	>300	>300	89	34	4
	>300	>300	>300	53	18	2			>300	>300	>300	107	27	3
	>300	>300	>300	77	17	3			>300	>300	>300	108	26	3
3	>300	>300	>300	46	8	1		3	>300	>300	>300	79	14	1
	>300	>300	>300	62	13	1			>300	>300	>300	68	16	1
	>300	>300	>300	67	17	2			>300	>300	>300	66	19	2
4	>300	>300	>300	55	6	0		4	>300	>300	>300	39	3	0	7mei
	>300	>300	>300	52	3	0			>300	>300	>300	29	1	0
	>300	>300	>300	67	7	0			>300	>300	>300	32	2	0
5	>300	>300	>300	62	6	0		5	>300	>300	>300	59	7	0
	>300	>300	>300	40	3	0			>300	>300	>300	53	4	0
	>300	>300	>300	40	1	0			>300	>300	>300	43	3	0
6	>300	>300	>300	83	16	1		6	>300	>300	>300	40	7	0
	>300	>300	>300	81	13	0			>300	>300	>300	31	4	0
	>300	>300	>300	72	12	0			>300	>300	>300	35	3	0
7	>300	>300	>300	97	22	3			>300	>300	>300	56	15	1	2015-07-28
	>300	>300	>300	85	17	1			>300	>300	>300	72	10	1
	>300	>300	>300	67	11	1			>300	>300	>300	78	11	1
8	>300	>300	>300	76	12	1			>300	>300	>300	81	7	0
	>300	>300	>300	69	4	0			>300	>300	>300	87	11	1
	>300	>300	>300	75	9	1			>300	>300	>300	89	8	1
9	>300	>300	>300	79	6	0			>300	>300	>300	47	4	0
	>300	>300	>300	78	6	0			>300	>300	>300	40	3	0
	>300	>300	>300	67	4	0			>300	>300	>300	36	2	0
Mean				67.6296	10.2222	0.814815		Mean				60.7778	10.4815	0.851852
STDEV				13.4969	5.83974	0.921414		STDEV				23.0807	8.64857	1.09908
e) Mentha sp.: S. sanguinis + Pudina								e) Mentha sp.: Smutans + Pudina
Bead	T2	T3	T4	T5	T6	T7		Bead	T2	T3	T4	T5	T6	T7
1	>300	>300	187	43	22	1		1	>300	>300	206	98	55	4	2015-04-21
	>300	>300	192	45	20	2			>300	>300	210	88	56	2
	>300	>300	191	37	21	3			>300	>300	198	69	60	4
2	>300	>300	121	39	9	0		2	>300	>300	148	57	4	0
	>300	>300	95	31	8	0			>300	>300	166	56	4	0
	>300	>300	158	41	4	0			>300	>300	203	54	4	0
3	>300	>300	201	43	17	1		3	>300	>300	234	69	29	0
	>300	>300	211	38	23	2			>300	>300	251	81	32	0
	>300	>300	207	43	30	3			>300	>300	244	71	44	0
4	>300	>300	287	58	6	0		4	>300	>300	>300	92	10	0	15-Mei
	>300	>300	180	58	6	0			>300	>300	>300	92	11	0
	>300	>300	270	68	7	0			>300	>300	>300	92	14	0
5	>300	>300	222	46	7	0		5	>300	>300	>300	65	8	0
	>300	>300	226	38	4	0			>300	>300	>300	69	8	0
	>300	>300	228	30	4	0			>300	>300	>300	62	4	0
6	>300	>300	179	45	5	0		6	>300	>300	>300	78	11	0
	>300	>300	201	43	2	0			>300	>300	>300	72	12	0
	>300	>300	178	44	3	0			>300	>300	>300	83	13	0
7	>300	>300	153	52	19	0		7	>300	>300	>300	63	6	0	2015-06-02
	>300	>300	188	48	13	0			>300	>300	>300	85	11	0
	>300	>300	193	60	11	0			>300	>300	>300	72	8	0
8	>300	>300	132	42	2	0		8	>300	>300	>300	55	4	0
	>300	>300	126	39	5	0			>300	>300	>300	63	11	0
	>300	>300	128	37	2	0			>300	>300	>300	46	5	0
9	>300	>300	105	32	4	0		9	>300	>300	>300	62	11	0
	>300	>300	89	30	1	0			>300	>300	>300	69	2	0
	>300	>300	111	35	1	0			>300	>300	>300	65	4	0
Mean			176.259	43.1481	9.48148	0.444444		Mean			206.667	71.4074	16.3333	0.37037
STDEV			50.7593	9.43277	8.13052	0.9337		STDEV			34.0991	13.5824	17.4598	1.11452
f) TriQ*: S. sanguinis + TriQ*								f) TriQ*: Smutans + TriQ*
Bead	T2	T3	T4	T5	T6	T7		Bead	T2	T3	T4	T5	T6	T7
1	>300	>300	>300	106	27	7		1	>300	>300	>300	61	11	4
	>300	>300	>300	91	26	5			>300	>300	>300	41	13	3	2015-04-12
	>300	>300	>300	107	26	6			>300	>300	>300	43	23	4
2	>300	>300	>300	121	39	13		2	>300	>300	>300	108	22	5
	>300	>300	>300	102	30	12			>300	>300	>300	93	22	4
	>300	>300	>300	103	29	7			>300	>300	>300	98	26	3
3	>300	>300	>300	75	29	8		3	>300	>300	>300	64	13	4
	>300	>300	>300	58	27	3			>300	>300	>300	52	21	6
	>300	>300	>300	68	30	5			>300	>300	>300	50	18	3
4	>300	>300	>300	56	30	3		4	>300	>300	>300	92	13	2
	>300	>300	>300	51	35	2			>300	>300	>300	94	25	6
	>300	>300	>300	40	32	4			>300	>300	>300	83	18	0
5	>300	>300	>300	104	43	7		5	>300	>300	>300	86	11	0
	>300	>300	>300	93	38	5			>300	>300	>300	90	17	0
	>300	>300	>300	86	29	3			>300	>300	>300	77	15	0
6	>300	>300	>300	92	29	3		6	>300	>300	>300	63	13	4
	>300	>300	>300	74	27	3			>300	>300	>300	69	15	3
	>300	>300	>300	92	30	3			>300	>300	>300	88	20	4
7	>300	>300	>300	60	6	1		7	>300	>300	>300	72	15	2	2015-06-08
	>300	>300	>300	65	6	1			>300	>300	>300	48	6	0
	>300	>300	>300	53	5	0			>300	>300	>300	60	14	1
8	>300	>300	243	42	4	0		8	>300	>300	>300	63	4	0
	>300	>300	248	45	4	0			>300	>300	>300	78	3	0
	>300	>300	283	48	7	1			>300	>300	>300	85	1	0
9	>300	>300	217	62	4	0		9	>300	>300	>300	67	4	0
	>300	>300	211	63	6	1			>300	>300	>300	98	2	0
	>300	>300	283	65	6	1			>300	>300	>300	75	2	0
mean				74.8889	22.3704	3.85185		mean				74	13.5926	2.14815
stdev				23.3491	12.8905	3.47191		stdev				18.3848	7.50005	2.0885

## Sheet: SPSS-sgi+sm-update
untreated						% adherence of Streptococcus sanguinis in form of multi-species biofilm on glass-beads-treated plant extract(s) ( x 10^5 CFU/ml)																								Mean CFU/ml of multi-species biofilm				STDEV
data label	C-ve					0.12%CHX					Psidium					Mangifera					Mentha					TriQ*					S. sanguinis	S. mutans		S. sanguinis	S. mutans
	CFU/ml	%adherence	%anti-ad			CFU/ml	%adherence	%anti-ad			CFU/ml	%adherence	%Anti-ad			CFU/ml	%adherence	%anti-ad			CFU/ml	%adherence	%anti-ad			CFU/ml	%adherence	%anti-ad		C-ve	149.33	154.3		35.87	34.54
1	199	100	0		2	10.8	5.42714	94.5729		3	13.1	6.58291	93.4171		4	69	34.6734	65.3266		5	43	21.608	78.392		6	106	53.2663	46.7337		0.12% CHX	8.13	0		3.26	0
1	183	100	0		2	10.7	5.84699	94.153		3	13.8	7.54098	92.459		4	70	38.2514	61.7486		5	45	24.5902	75.4098		6	91	49.7268	50.2732		Psidium sp.	15.99	17.19		4.3	5.45
1	176	100	0		2	9.6	5.45455	94.5455		3	14.2	8.06818	91.9318		4	68	38.6364	61.3636		5	37	21.0227	78.9773		6	107	60.7955	39.2045		Mangifera sp.	67.63	60.78		13.5	23.08
1	164	100	0		2	15.8	9.63415	90.3659		3	21.8	13.2927	86.7073		4	69	42.0732	57.9268		5	39	23.7805	76.2195		6	121	73.7805	26.2195		Mentha sp.	43.15	71.41		9.433	13.58
1	199	100	0		2	14.8	7.43719	92.5628		3	22.9	11.5075	88.4925		4	53	26.6332	73.3668		5	31	15.5779	84.4221		6	102	51.2563	48.7437		PEM	74.89	74		23.35	18.38
1	171	100	0		2	13.9	8.12865	91.8713		3	18.8	10.9942	89.0058		4	77	45.0292	54.9708		5	41	23.9766	76.0234		6	103	60.2339	39.7661
1	115	100	0		2	9.4	8.17391	91.8261		3	24.5	21.3043	78.6957		4	46	40	60		5	43	37.3913	62.6087		6	75	65.2174	34.7826
1	116	100	0		2	8.4	7.24138	92.7586		3	21.6	18.6207	81.3793		4	62	53.4483	46.5517		5	38	32.7586	67.2414		6	58	50	50
1	105	100	0		2	11.5	10.9524	89.0476		3	15.8	15.0476	84.9524		4	67	63.8095	36.1905		5	43	40.9524	59.0476		6	68	64.7619	35.2381
1	156	100	0		2	9.9	6.34615	93.6538		3	11.3	7.24359	92.7564		4	55	35.2564	64.7436		5	58	37.1795	62.8205		6	56	35.8974	64.1026
1	214	100	0		2	8.3	3.8785	96.1215		3	10.5	4.90654	95.0935		4	52	24.2991	75.7009		5	58	27.1028	72.8972		6	51	23.8318	76.1682
1	194	100	0		2	7.6	3.91753	96.0825		3	10.5	5.41237	94.5876		4	67	34.5361	65.4639		5	68	35.0515	64.9485		6	40	20.6186	79.3814
1	165	100	0		2	6.9	4.18182	95.8182		3	10.7	6.48485	93.5152		4	62	37.5758	62.4242		5	46	27.8788	72.1212		6	104	63.0303	36.9697
1	121	100	0		2	7.2	5.95041	94.0496		3	14.5	11.9835	88.0165		4	40	33.0579	66.9421		5	38	31.405	68.595		6	93	76.8595	23.1405
1	124	100	0		2	8.4	6.77419	93.2258		3	12.1	9.75806	90.2419		4	40	32.2581	67.7419		5	30	24.1935	75.8065		6	86	69.3548	30.6452
1	109	100	0		2	6.1	5.59633	94.4037		3	18.8	17.2477	82.7523		4	83	76.1468	23.8532		5	45	41.2844	58.7156		6	92	84.4037	15.5963		% adherence of multi-species biofilm				STDEV
1	108	100	0		2	7.6	7.03704	92.963		3	18.4	17.037	82.963		4	81	75	25		5	43	39.8148	60.1852		6	74	68.5185	31.4815			S. sanguinis	S. mutans		S. sanguinis	S. mutans
1	118	100	0		2	7.2	6.10169	93.8983		3	12.3	10.4237	89.5763		4	72	61.0169	38.9831		5	44	37.2881	62.7119		6	92	77.9661	22.0339		C-ve	100	100		0	0
1	182	100	0		2	3.9	2.14286	97.8571		3	18.5	10.1648	89.8352		4	97	53.2967	46.7033		5	52	28.5714	71.4286		6	60	32.967	67.033		0.12% CHX	5.66	0		2.23	0
1	186	100	0		2	3.5	1.88172	98.1183		3	21.4	11.5054	88.4946		4	85	45.6989	54.3011		5	48	25.8065	74.1935		6	65	34.9462	65.0538		Psidium sp.	11.46	11.35		4.47	3.21
1	180	100	0		2	4.3	2.38889	97.6111		3	16.3	9.05556	90.9444		4	67	37.2222	62.7778		5	60	33.3333	66.6667		6	53	29.4444	70.5556		Mangifera sp.	47.94	40.42		15.5	14.95
1	107	100	0		2	5.7	5.3271	94.6729		3	10.5	9.81308	90.1869		4	76	71.028	28.972		5	42	39.2523	60.7477		6	42	39.2523	60.7477		Mentha sp.	29.88	49.46		6.9	18.64
1	159	100	0		2	4.2	2.64151	97.3585		3	11.6	7.2956	92.7044		4	69	43.3962	56.6038		5	39	24.5283	75.4717		6	45	28.3019	71.6981		PEM	52.5	50.92		17.93	18.88
1	145	100	0		2	4.2	2.89655	97.1034		3	12.4	8.55172	91.4483		4	75	51.7241	48.2759		5	37	25.5172	74.4828		6	48	33.1034	66.8966
1	107	100	0		2	5.9	5.51402	94.486		3	18.7	17.4766	82.5234		4	79	73.8318	26.1682		5	32	29.9065	70.0935		6	62	57.9439	42.0561
1	118	100	0		2	7.4	6.27119	93.7288		3	18.6	15.7627	84.2373		4	78	66.1017	33.8983		5	30	25.4237	74.5763		6	63	53.3898	46.6102
1	111	100	0		2	6.2	5.58559	94.4144		3	18	16.2162	83.7838		4	67	60.3604	39.6396		5	35	31.5315	68.4685		6	65	58.5586	41.4414
Mean	149.333	100	0		2	8.12593	5.65665	94.3434		3	15.9852	11.4555	88.5445		4	67.6296	47.9393	52.0607		5	43.1481	29.8788	70.1212		6	74.8889	52.4973	47.5027
STDEV	35.8662	0	0		0	3.26244	2.22658	2.22658		0	4.30015	4.46994	4.46994		0	13.4969	15.4954	15.4954		0	9.43277	6.89802	6.89802		0	23.3491	17.9321	17.9321
untreated						% adherence of S. mutans in form of multi-species biofilm on glass-beads-treated plant extract(s) (x 10^5 CFU/ml)																									% Anti-adherence of multi-species biofilm				STDEV
data label	C-ve					0.12%CHX					Psidium					Mangifera					Mentha					PEM						Strep. sanguinis BAA-1455	Strep. mutans ATCC 25175		S. sanguinis	S. mutans
	CFU/ml	%adherence	%anti-ad			CFU/ml	%adherence	%anti-ad			CFU/ml	%adherence	%anti-ad			CFU/ml	%adherence	%anti-ad			CFU/ml	%adherence	%anti-ad			CFU/ml	%adherence	%anti-ad			C-ve	0	0		0	0
1	164	100	0		2	0	0	100		3	12	7.31707	92.6829		4	59	35.9756	64.0244		5	98	59.7561	40.2439		6	61	37.1951	62.8049			0.12% CHX	94.34	100		2.23	0
1	173	100	0		2	0	0	100		3	13.2	7.63006	92.3699		4	56	32.3699	67.6301		5	88	50.8671	49.1329		6	41	23.6994	76.3006			Psidium sp.	88.54	88.65		4.47	3.21
1	183	100	0		2	0	0	100		3	15.8	8.63388	91.3661		4	62	33.8798	66.1202		5	69	37.7049	62.2951		6	43	23.4973	76.5027			Mangifera sp.	52.06	59.58		15.5	14.95
1	163	100	0		2	0	0	100		3	17.4	10.6748	89.3252		4	89	54.6012	45.3988		5	57	34.9693	65.0307		6	108	66.2577	33.7423			Mentha sp.	70.12	50.54		6.9	18.64
1	183	100	0		2	0	0	100		3	29.2	15.9563	84.0437		4	107	58.4699	41.5301		5	56	30.6011	69.3989		6	93	50.8197	49.1803			PEM	47.5	49.08		17.93	18.88
1	185	100	0		2	0	0	100		3	21	11.3514	88.6486		4	108	58.3784	41.6216		5	54	29.1892	70.8108		6	98	52.973	47.027
1	124	100	0		2	0	0	100		3	22.8	18.3871	81.6129		4	79	63.7097	36.2903		5	69	55.6452	44.3548		6	64	51.6129	48.3871
1	124	100	0		2	0	0	100		3	20.2	16.2903	83.7097		4	68	54.8387	45.1613		5	81	65.3226	34.6774		6	52	41.9355	58.0645
1	122	100	0		2	0	0	100		3	13.2	10.8197	89.1803		4	66	54.0984	45.9016		5	71	58.1967	41.8033		6	50	40.9836	59.0164
1	105	100	0		2	0	0	100		3	10.3	9.80952	90.1905		4	39	37.1429	62.8571		5	92	87.619	12.381		6	92	87.619	12.381
1	102	100	0		2	0	0	100		3	14.1	13.8235	86.1765		4	29	28.4314	71.5686		5	92	90.1961	9.80392		6	94	92.1569	7.84314
1	93	100	0		2	0	0	100		3	13.7	14.7312	85.2688		4	32	34.4086	65.5914		5	92	98.9247	1.07527		6	83	89.2473	10.7527
1	191	100	0		2	0	0	100		3	13.9	7.27749	92.7225		4	59	30.8901	69.1099		5	65	34.0314	65.9686		6	86	45.0262	54.9738
1	173	100	0		2	0	0	100		3	15.9	9.19075	90.8092		4	53	30.6358	69.3642		5	69	39.8844	60.1156		6	90	52.0231	47.9769
1	183	100	0		2	0	0	100		3	13.1	7.15847	92.8415		4	43	23.4973	76.5027		5	62	33.8798	66.1202		6	77	42.0765	57.9235
1	208	100	0		2	0	0	100		3	29.5	14.1827	85.8173		4	40	19.2308	80.7692		5	78	37.5	62.5		6	63	30.2885	69.7115
1	217	100	0		2	0	0	100		3	24.6	11.3364	88.6636		4	31	14.2857	85.7143		5	72	33.1797	66.8203		6	69	31.7972	68.2028
1	149	100	0		2	0	0	100		3	20.1	13.4899	86.5101		4	35	23.4899	76.5101		5	83	55.7047	44.2953		6	88	59.0604	40.9396
1	164	100	0		2	0	0	100		3	24.4	14.878	85.122		4	56	34.1463	65.8537		5	63	38.4146	61.5854		6	72	43.9024	56.0976
1	200	100	0		2	0	0	100		3	20.1	10.05	89.95		4	72	36	64		5	85	42.5	57.5		6	48	24	76
1	150	100	0		2	0	0	100		3	21.5	14.3333	85.6667		4	78	52	48		5	72	48	52		6	60	40	60
1	122	100	0		2	0	0	100		3	10.7	8.77049	91.2295		4	81	66.3934	33.6066		5	55	45.082	54.918		6	63	51.6393	48.3607
1	155	100	0		2	0	0	100		3	14.6	9.41935	90.5806		4	87	56.129	43.871		5	63	40.6452	59.3548		6	78	50.3226	49.6774
1	145	100	0		2	0	0	100		3	14	9.65517	90.3448		4	89	61.3793	38.6207		5	46	31.7241	68.2759		6	85	58.6207	41.3793
1	133	100	0		2	0	0	100		3	10.8	8.1203	91.8797		4	47	35.3383	64.6617		5	62	46.6165	53.3835		6	67	50.3759	49.6241
1	156	100	0		2	0	0	100		3	13.5	8.65385	91.3462		4	40	25.641	74.359		5	69	44.2308	55.7692		6	98	62.8205	37.1795
1	100	100	0		2	0	0	100		3	14.5	14.5	85.5		4	36	36	64		5	65	65	35		6	75	75	25
Mean	154.333	100	0		2	0	0	100		3	17.1889	11.3497	88.6503		4	60.7778	40.4208	59.5792		5	71.4074	49.4587	50.5413		6	74	50.9241	49.0759
STDEV	34.5365	0	0		0	0	0	0		0	5.4529	3.21427	3.21427		0	23.0807	14.9534	14.9534		0	13.5824	18.638	18.638		0	18.3848	18.876	18.876
